# Supplementary material for: Elusive ditrysian phylogeny: an account of combining systematized morphology with molecular data (Lepidoptera)
Source: PubMed Central journal article supplement (PMC4654798; doi:10.1186/s12862-015-0520-0), 2015-11-21

Ericocrania\_sempurpurella

Hepialus\_humuli

Incurvaria\_pectinea

Andesiana\_lamellata

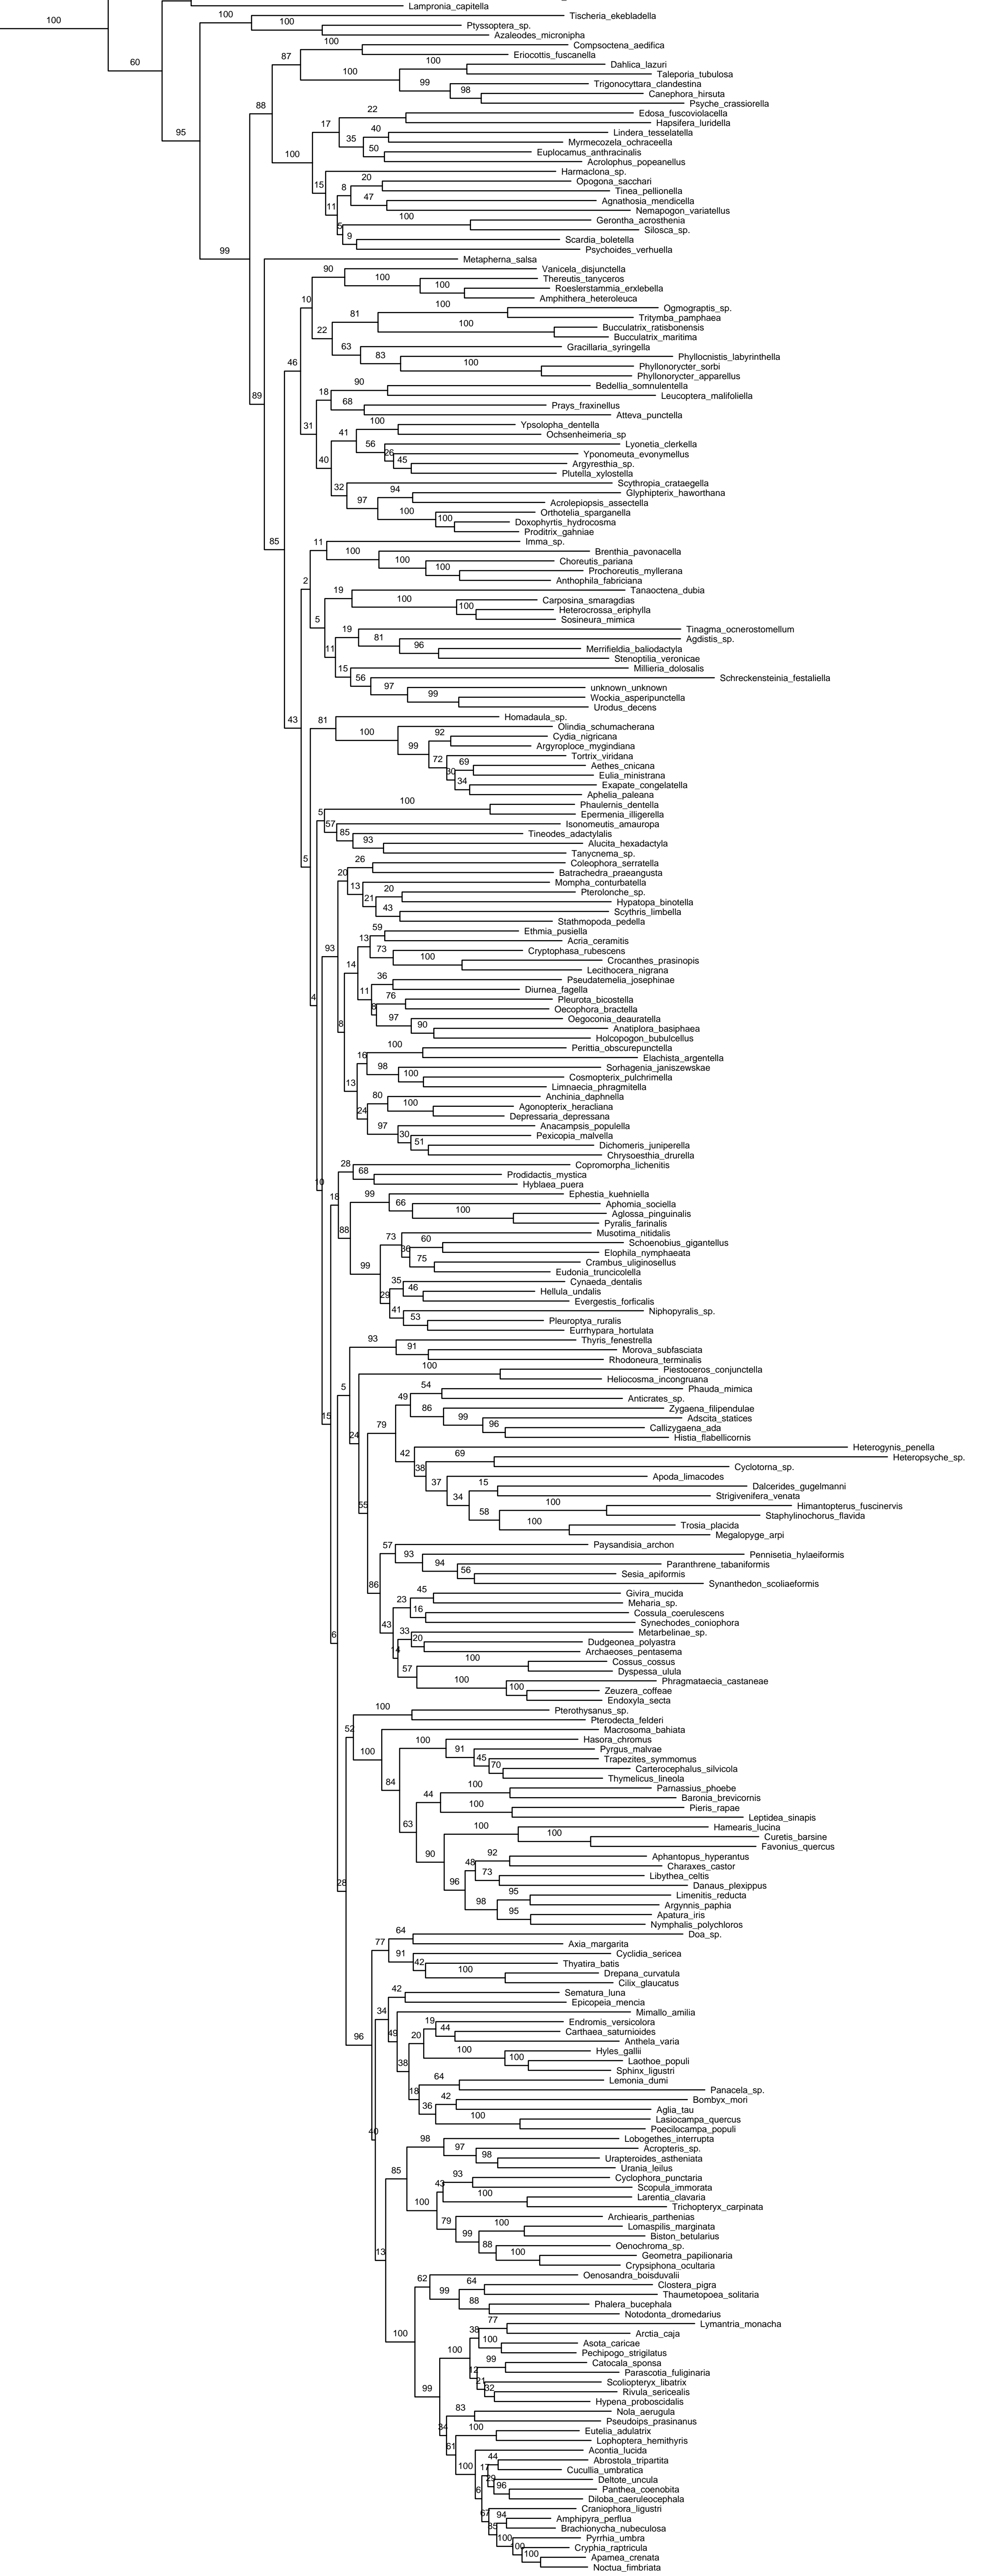

Supplement: 12862_2015_520_MOESM12_ESM.pdf [file 12862_2015_520_MOESM12_ESM.pdf]
